# Supplementary material
Source: Elsevier journal article supplement (https://www.sciencedirect.com/science/article/pii/S2173579420300141)
Supplement: mmc1 [file S2173579420300141:mmc1.docx]

**Supplemental materials**

**Supplemental Table 1.** Summary of the studies did not include for analysis

| **Remark** | **Author** | **Type** | **Case** | | | **Control** | | |
| --- | --- | --- | --- | --- | --- | --- | --- | --- |
| **n** | **mean** | **SD** | **n** | **mean** | **SD** |
| Did not fit for data analysis | Chono et al, 2018 [1] | POAG | 38 | na# | na | 100 | na | na |
| EXG | 31 | na | na |
| Did not fit for data analysis | Chua et al, 2012* [2] | PACG | 12 | 24,75# | 19,5 | 23 | 6,79 | 4,75 |
| Not a case control | Cvenkel et al, 2010* [3] | POAG | 26 | 69,5 | 39,5 | na | na | na |
| EXG | 4 | 36,5 | 6,25 |
| Did not fit for data analysis | Du et al, 2016* [4] | PACG | 18 | 346,755# | 254,93 | 18 | 5,1625 | 3,1375 |
| Did not fit for data analysis | Duvesh et al, 2017* [5] | PACG | 19 | 52,69# | 39,23 | 14 | 11,905 | 3,925 |
| Did not fit for data analysis | Gramlich et al, 2013 [6] | Glaucoma | 5 | 13394# | 2749 | 5 | 9990 | 1632 |
| Did not fit for data analysis | Inoue et al, 2012 [7] | POAG | 23 | 15,2# | na | 52 | 4,6 | na |
| EXG | 26 | 12,3 | na |
| Did not fit for data analysis | Wang et al, 2018 [8] | PACG | 40 | 5,8 | 7,5 | 24 | 6,7 | 7,7 |

POAG, primary open-angle glaucoma; PACG, primary angle-closure glaucoma; EXG, exfoliative glaucoma; n and SD, represented number of samples and stand deviation of glaucoma patients and control subjects, respectively. *Indicate the mean and SD were estimated from median, range, and the size of the sample as previously described [9]. #Indicate a significant difference compared to control.

**References**

1. Chono I,Miyazaki D,Miyake H, Komatsu N, Ehara F, Nagase D,et al. High interleukin-8 level in aqueous humor is associated with poor prognosis in eyes with open angle glaucoma and neovascular glaucoma. Sci Rep 2018; 8:14533. doi: 10.1038/s41598-018-32725-3.
2. Chua J, Vania M, Cheung CM, Ang M, Chee SP, Yang H, et al. Expression profile of inflammatory cytokines in aqueous from glaucomatous eyes. Mol Vis 2012; 18:431-8.
3. Cvenkel B, Kopitar AN, Ihan A. Inflammatory molecules in aqueous humour and on ocular surface and glaucoma surgery outcome. Mediators Inflamm 2010; 2010:939602. doi: 10.1155/2010/939602.
4. Du S, Huang W, Zhang X, Wang J, Wang W, Lam DSC. Multiplex cytokine levels of aqueous humor in acute primary angle-closure patients: fellow eye comparison. BMC Ophthalmol 2016; 16:6. doi: 10.1186/s12886-016-0182-8.
5. Duvesh R, Puthuran G, Srinivasan K, Rengaraj V, Krishnadas SR, Rajendrababu S, et al. Multiplex Cytokine Analysis of Aqueous Humor from the Patients with Chronic Primary Angle Closure Glaucoma. Curr Eye Res 2017; 42:1608-1613. doi: 10.1080/02713683.2017.1362003.
6. Gramlich OW, Beck , von Thun Und Hohenstein-Blaul N, Boehm N, Ziegler A, Vetter JM, et al. Enhanced insight into the autoimmune component of glaucoma: IgG autoantibody accumulation and pro-inflammatory conditions in human glaucomatous retina. PLoS One 2013; 8:e57557. doi: 10.1371/journal.pone.0057557.
7. Inoue T, Kawaji T, Inatani M, Kameda T, Yoshimura N, Tanihara H. Simultaneous increases in multiple proinflammatory cytokines in the aqueous humor in pseudophakic glaucomatous eyes. J Cataract Refract Surg 2012; 38(8):1389-97. doi: 10.1016/j.jcrs.2012.04.028.
8. Wang Y, Chen S, Liu Y, Huang W, Li X, Zhang X. Inflammatory cytokine profiles in eyes with primary angle-closure glaucoma. Biosci Rep 2018; 38. pii: BSR20181411. doi: 10.1042/BSR20181411.
9. Hozo SP, Djulbegovic B, Hozo I. Estimating the mean and variance from the median, range, and the size of a sample. BMC Med Res Methodol 2005;5:13. doi: 10.1186/1471-2288-5-13.
